# Supplementary material for: Acute Hypersensitivity of Pluripotent Testicular Cancer-Derived Embryonal Carcinoma to Low-Dose 5-Aza Deoxycytidine Is Associated with Global DNA Damage-Associated p53 Activation, Anti-Pluripotency and DNA Demethylation
Source: PLoS One. 2012 Dec 27;7(12):e53003. doi: 10.1371/journal.pone.0053003 (PMC3531428; doi:10.1371/journal.pone.0053003)
Supplement: Table S6 — Primers used in this study. (XLSX) [file pone.0053003.s011.xlsx]

## Sheet: sTable6
Table S6. Primers used
qPCR
Gene	Forward Primer (5'-3')	Reverse Primer (5'-3')
RIN1	AAGGGTCATTCGGGGCGGGA	GTGGGGCTTGCTGGCGCTAA
SOX15	GGAGTGGGAGAGCCAGGGGG	GCTCCAGGGGGAACTGCTGC
TLR4	CCTGAGGCATTTCTTGCCCAGC	AGGCCTGACATGTGGCAGCA
p21	GATTGCGATGCGCTCATG	TCTCCGTGACGAAGTCAAAGTTC
STK17A	GCTGGGGAGAGCGGGTGTTT	CATAGTTCAGGATTTCTGGAGCTAAA
LMNA	TACCGACCTGGTGTGGAAGGCA	CTCAGCGGCGGCTACCACTCAC
ANXA1	TTCACCCAAGTGGTGCAGGGGA	AGGCCACTCCCTCTCAGCTCC
ACTA2	CGGAGCGGACCTTTGGCTTGG	GGGGGACCCCGGTTGGAGAG
ANK1	TTCACCCAAGTGGTGCAGGGGA	AGGCCACTCCCTCTCAGCTCC
GAPDH	GATTCCACCCATGGCAAATT	GATGGTGATGGGATTTCCATTG
pyrosequencing	Forward Primer (5'-3')	Reverse Primer (5'-3')	Sequnecing Primer (5'-3')
RIN1	TGGGAGTTTTTTAGTTTTAGGAAGAGAATT	ACACTAACCAAACAAAATAAACACACAA	TTTTAGGAAGAGAATTTAGTTTTAA
SOX15	GAGAAAAAGTTTGGAGTTAGAATAGAATA	AACTAAAAACCAAAACAAACTACTTAAT	GTTTGGAGTTAGAATAGAATATTA
TLR4	AGGAAGGTTATGGTTGGGATTA	CCCTTTAACCCAAAACTACTTTAAATAC	AGTAGTGGTTTTGTGAA
